# Supplementary material
Source: PubMed Central journal article supplement (PMC5518752)
Supplement: NIHMS621160-supplement-Supplemental_Table_2.pdf [file NIHMS621160-supplement-Supplemental_Table_2.pdf]

| Cell line | O <sub>2</sub> level | (IC <sub>50</sub> -SE) – (IC <sub>50</sub> +SE) |
|-----------|----------------------|-------------------------------------------------|
| PANC-1    | NO                   | < 1.5                                           |
|           | HO                   | 2.17 – 2.72                                     |
| SNB-75    | NO                   | 2.24 – 2.73                                     |
|           | HO                   | 1.83 – 2.49                                     |
| HELA      | NO                   | 2.47 – 2.82                                     |
|           | HO                   | 2.24 – 2.73                                     |
| PC-3      | NO                   | 2.51 - 2.76                                     |
|           | HO                   | 2.86 - 2.91                                     |
| HI-LAPC-4 | NO                   | 2.66 – 2.80                                     |
|           | HO                   | 1.95 – 2.06                                     |

**Suppl Table 2.** Cancer cells were treated with DPS for 4 hr under normoxia (NO) or hypoxia (HO), and the proliferation was measured by clonogenic assay. Data were analyzed by Sigmoidal dose-response modeling, and expressed as IC<sub>50</sub>s with the range of standard error.
